# Supplementary material for: Sciatic nerve stimulation alleviates acute neuropathic pain via modulation of neuroinflammation and descending pain inhibition in a rodent model
Source: PubMed Central journal article supplement (PMC9199305; doi:10.1186/s12974-022-02513-y), 2022-06-15
Supplement: 12974_2022_2513_MOESM1_ESM.pdf [file 12974_2022_2513_MOESM1_ESM.pdf]

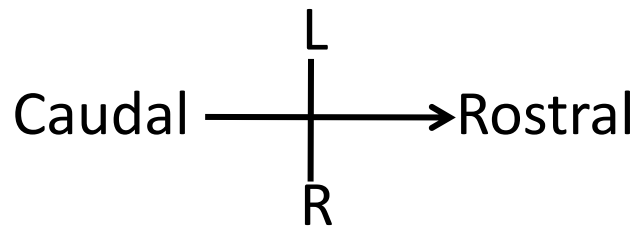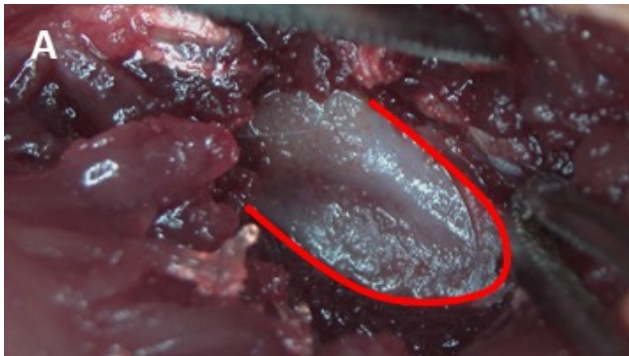

Exposure of L5  
transverse process

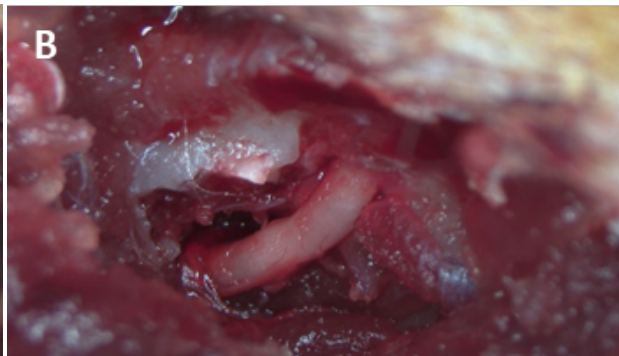

Exposure of L5  
nerve root

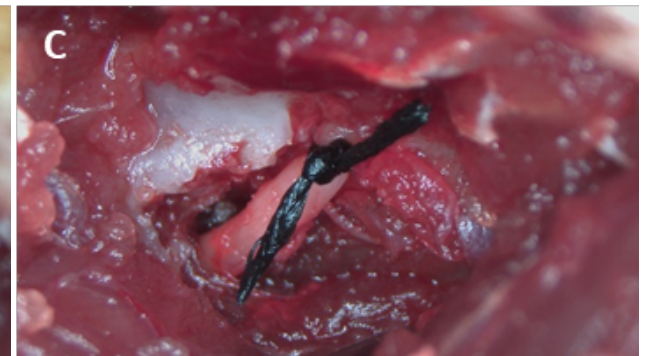

L5 nerve root  
ligation
